# Supplementary material
Source: ML conference proceedings conference paper supplement (https://aclanthology.org/D18-1530)
Supplement: Attachment [file D18-1530.Attachment.zip]

Archive with 3 entries (2 files):
- appendix-camera-ready.pdf
- __MACOSX/
- __MACOSX/._appendix-camera-ready.pdf
